# Supplementary material
Source: PubMed Central journal article supplement (PMC2884103)

**Rhinovirus-induced modulation of gene expression in bronchial epithelial cells from subjects with asthma**

YA Bochkov, KM Hanson, S Keles, RA Brockman-Schneider, NN Jarjour, and JE Gern

**Online supplementary materials**

**Supplementary Figure 1** Clustering analysis of gene expression patterns. Hierarchical clustering of gene expression profiles based on 42 genes differentially expressed in asthmatic cells using fold change ratios (infection / mock) fails to differentiate samples according to the asthma phenotype.

**Supplementary Figure 2** Optimization of the HRV1A infection procedure in PBE cells. (a) Representative microphotographs (magnification X100) of cells either mock-infected or infected with increasing doses of HRV1A. With increasing doses of HRV1A, the yield of viral RNA increased (b), while total cellular (floating and adherent cells) RNA decreased (c). Each bar represent the mean data from two independent experiments using cells from different donors.



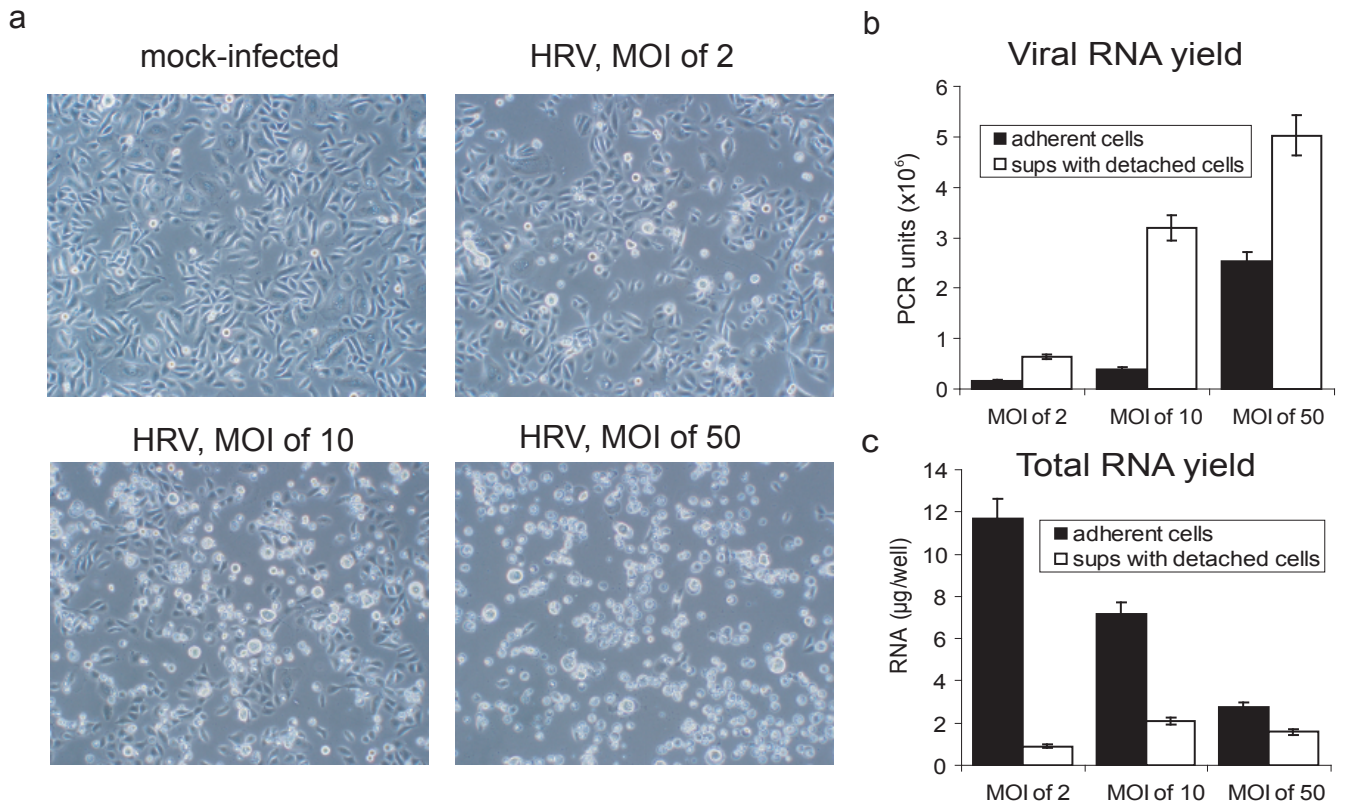

Supplement: NIHMS201082-supplement-Supplementary_Figures.pdf [file NIHMS201082-supplement-Supplementary_Figures.pdf]
